# Supplementary material for: cGAS suppresses genomic instability as a decelerator of replication forks
Source: PubMed Central journal article supplement — Sci Adv. 2020 Oct 14;6(42):eabb8941. doi: 10.1126/sciadv.abb8941 (PMC7556829; doi:10.1126/sciadv.abb8941), 2020-10-14
Supplement: abb8941_SM.pdf [file abb8941_SM.pdf]

[advances.sciencemag.org/cgi/content/full/6/42/eabb8941/DC1](https://advances.sciencemag.org/cgi/content/full/6/42/eabb8941/DC1)

## Supplementary Materials for

### **cGAS suppresses genomic instability as a decelerator of replication forks**

Hao Chen, Hao Chen, Jiamin Zhang, Yumin Wang, Antoine Simoneau, Hui Yang, Arthur S. Levine,  
Lee Zou, Zhijian Chen, Li Lan\*

\*Corresponding author. Email: [llan1@mgh.harvard.edu](mailto:llan1@mgh.harvard.edu)

Published 14 October 2020, *Sci. Adv.* **6**, eabb8941 (2020)  
DOI: [10.1126/sciadv.abb8941](https://doi.org/10.1126/sciadv.abb8941)

#### **This PDF file includes:**

Figs. S1 to S5  
Table S1

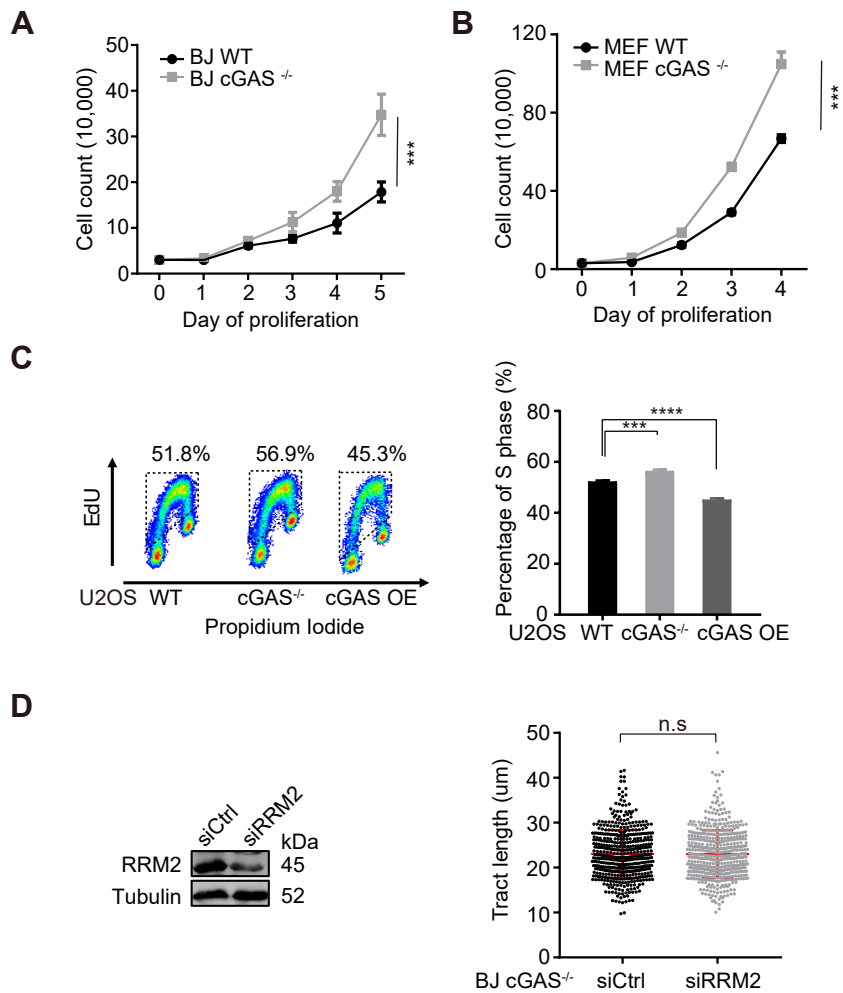

**Figure S1 | cGAS prevents fast proliferation and accelerated replication.**

(A-B) Proliferation curve based on the number of BJ WT/cGAS<sup>-/-</sup> (A) and MEF WT/cGAS<sup>-/-</sup> (B) cells on the indicated day. (C) The staining of EdU and PI in U2OS WT, corresponding cGAS<sup>-/-</sup>, and overexpression cells were analyzed by flow cytometry. The percentage of S phase from flow-cytometry analysis is shown. (D) Analysis of nascent DNA tract length (n=500) in BJ cGAS<sup>-/-</sup> cells of siCtrl and siRRM2. WB of RRM2 siCtrl and siRRM2 in BJ cGAS<sup>-/-</sup> cells is shown.

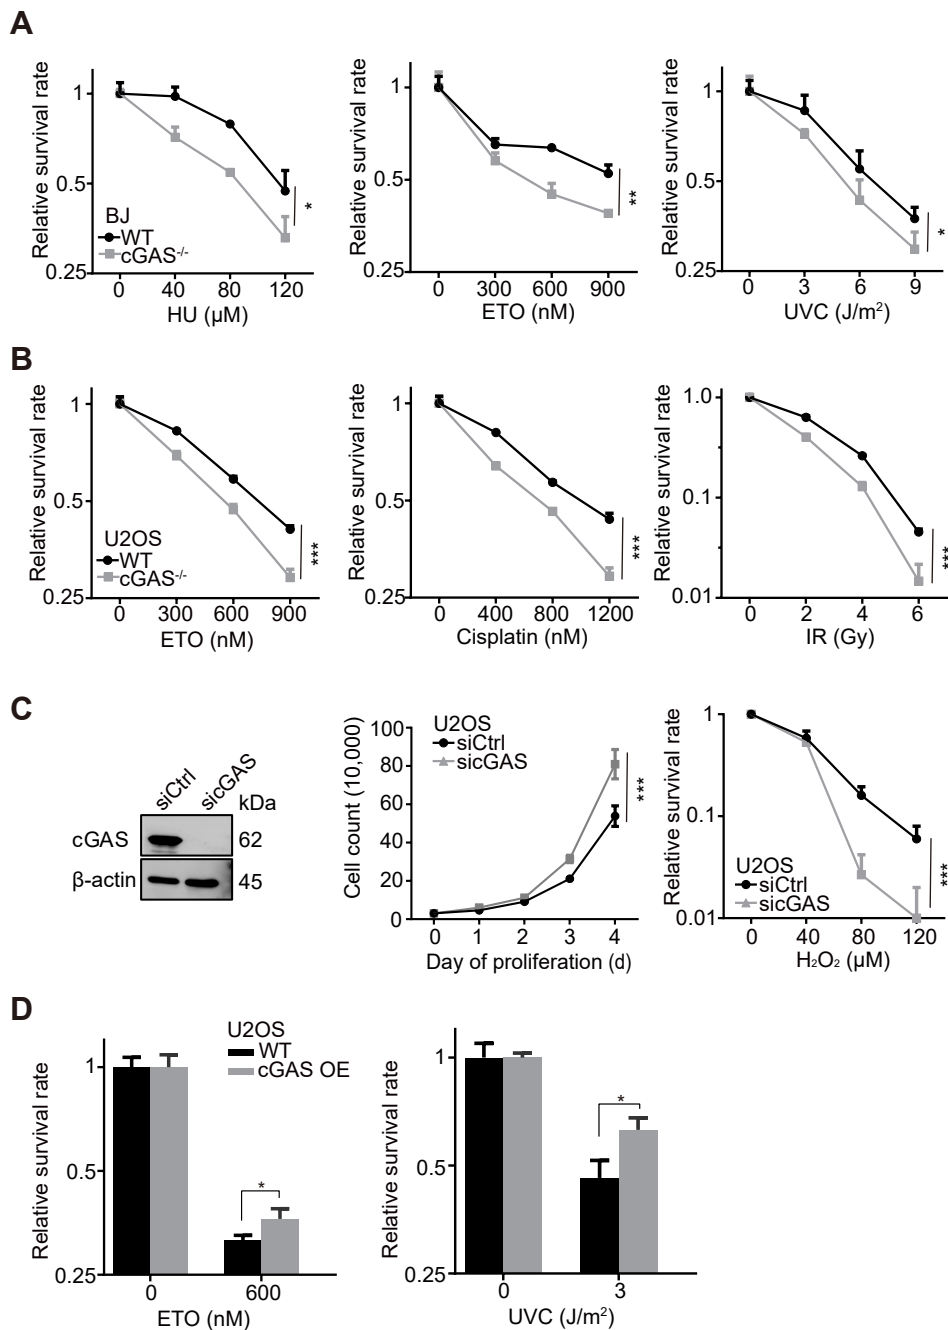

**Figure S2 | cGAS protects cells from various types of damage.**

(A) Colony formation assay for BJ WT and cGAS<sup>-/-</sup> cells with indicated dose of hydroxyurea (HU), etoposide (ETO), or ultraviolet C (UVC). (B) Colony formation assay for U2OS WT and cGAS<sup>-/-</sup> cells with indicated dose of ETO, cis-platin, or IR. (C) Cell proliferation rate and cell survival via colony formation assay of U2OS siCtrl and sicGAS with indicated dose of H<sub>2</sub>O<sub>2</sub>. WB of cGAS siCtrl and sicGAS in U2OS cells is shown. (D) Colony formation assay for U2OS WT and cGAS -OE cells with indicated dose of ETO and UVC.

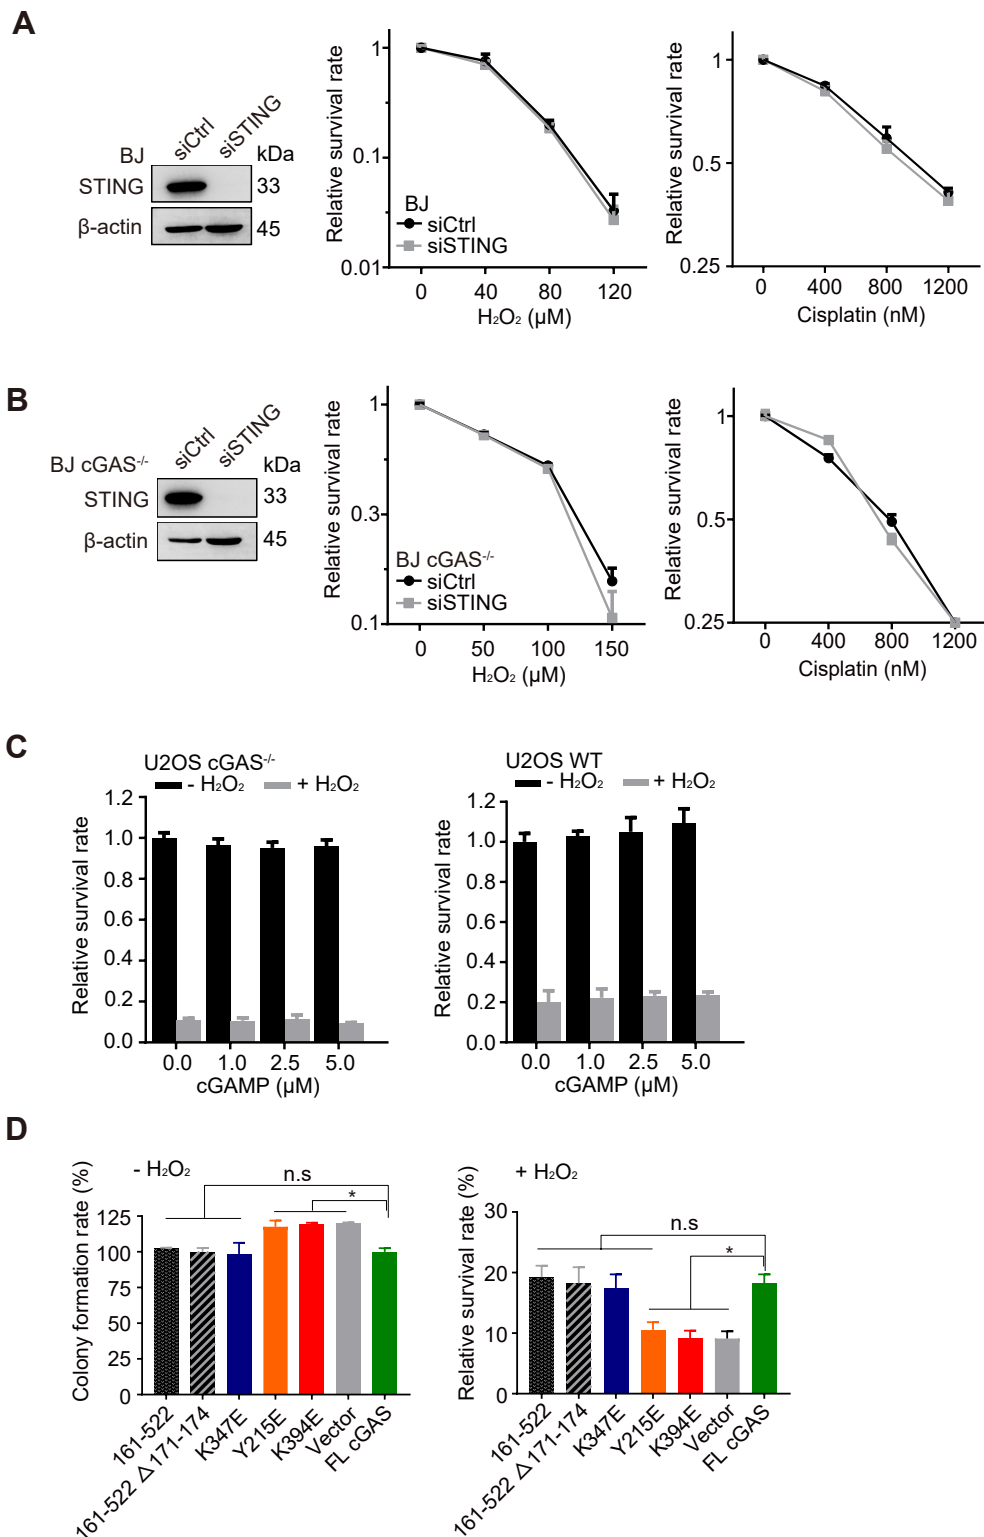

**Figure S3 | cGAS depletion sensitizes cells to IR and chemo-drugs independently of STING and cGAMP.**

(A) Expression of STING in siCtrl and siSTING transfected BJ WT cells. Colony formation assay for siCtrl and siSTING transfected cells with the indicated dose of cisplatin. (B) Expression of STING in siCtrl and siSTING transfected BJ cGAS<sup>-/-</sup> cells. Colony formation assay for siCtrl and siSTING transfected cells with the indicated dose of H<sub>2</sub>O<sub>2</sub> and cisplatin. (C) Colony formation assay for U2OS WT and cGAS<sup>-/-</sup> cells incubated with cGAMP at the indicated concentration and cultured in the presence or absence of 100 μM H<sub>2</sub>O<sub>2</sub> for 7-10 days. (D) Colony formation assay for U2OS cGAS<sup>-/-</sup> cells expressing the indicated cGAS mutants without and with 100 μM H<sub>2</sub>O<sub>2</sub> treatment.

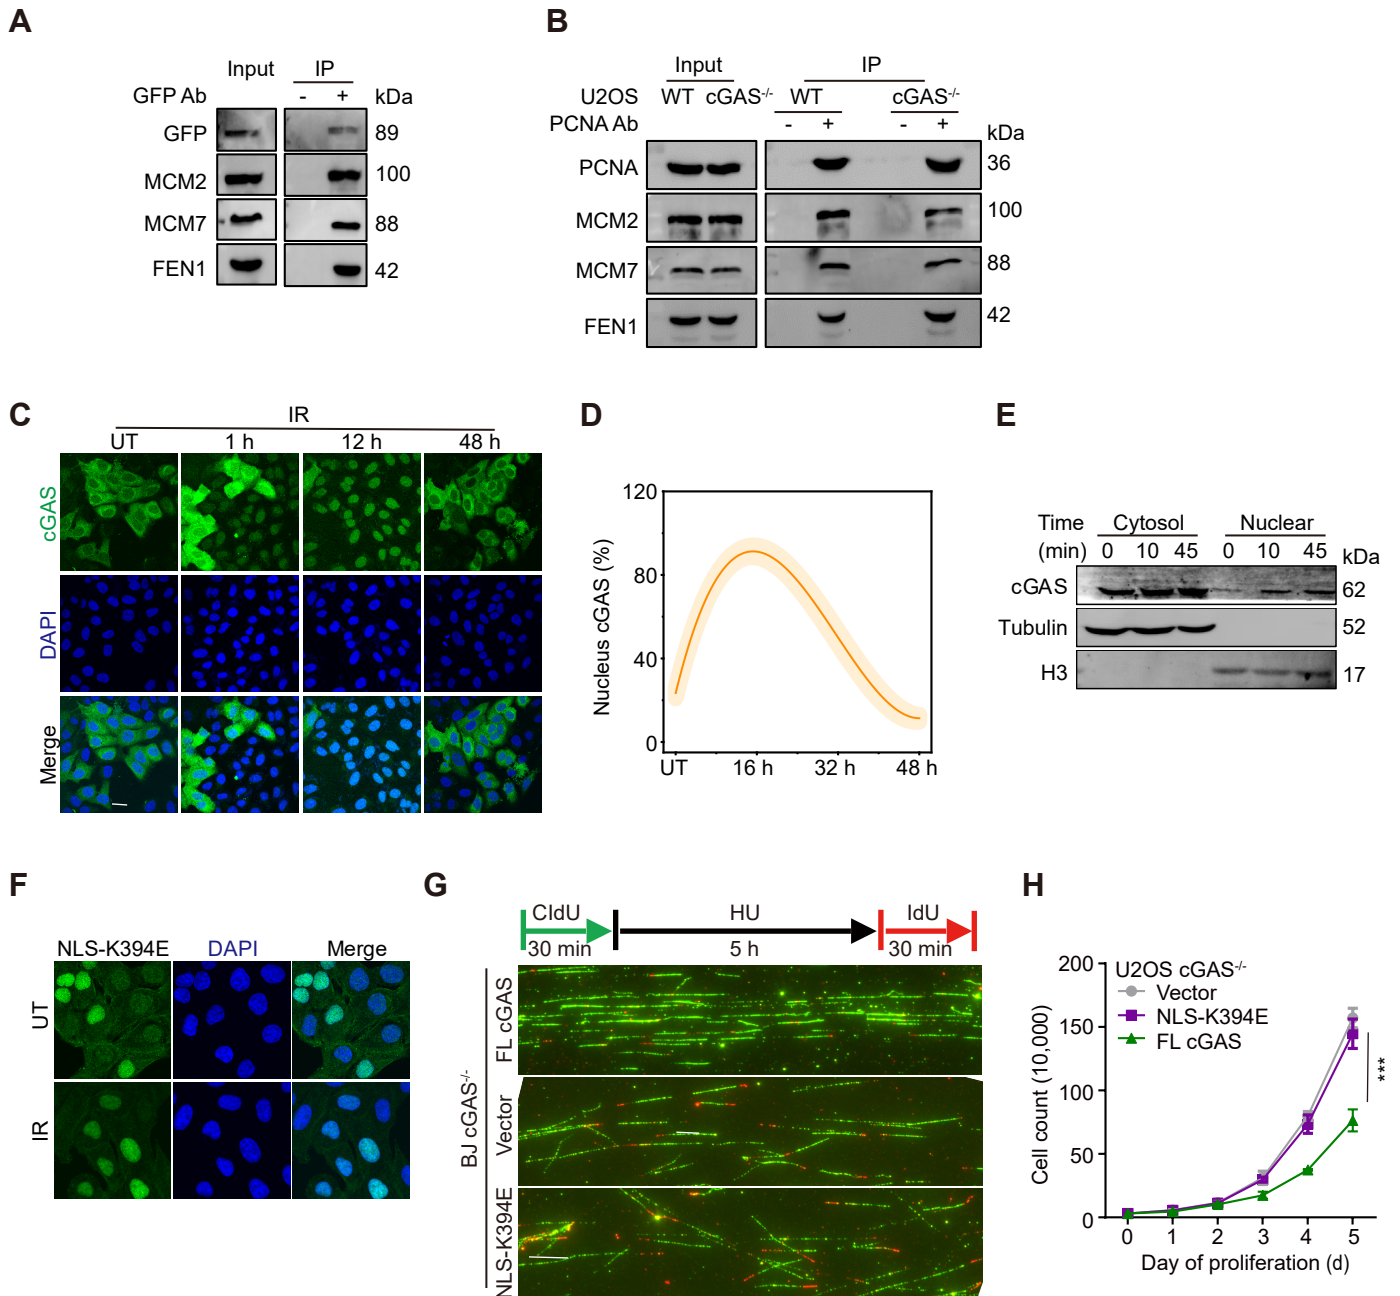

### Figure S4 | cGAS is translocated into the nucleus after damage.

(A) Interaction of cGAS and MCM2/MCM7/FEN1 detected with Co-IP. GFP-cGAS overexpression U2OS cells were used for Co-IP analysis with or without anti-GFP antibody. (B) Interaction of PCNA and MCM2/MCM7/FEN1 detected with Co-IP with or without cGAS. U2OS WT and cGAS<sup>-/-</sup> cells were used for Co-IP analysis with or without anti-PCNA antibody. (C-D) Immunostaining of endogenous cGAS in U2OS cells before and after treatment with 1 mM H<sub>2</sub>O<sub>2</sub> for the indicated time (scale bar: 10 μm). The percentage change of cGAS expression in the nucleus is fitted by Python package NumPy. (E) Immunoblot estimation of cGAS in nuclear/cytosolic fractions of U2OS cells treated with 1 mM H<sub>2</sub>O<sub>2</sub> for the indicated time. β-actin and H3 are nuclear and cytosolic markers, respectively. (F) Immunostaining of cGAS in U2OS cGAS<sup>-/-</sup> cells transfected with NLS-flag-K394E mutant before and after treatment with 2 Gy IR (scale bar: 10 μm). (G) The replication fork status of BJ cGAS<sup>-/-</sup> cells transfected with flag-tagged cGAS NLS-K394E mutant treated with 4 mM HU for 5 h. Representative images of fiber assay are shown (scale bar: 10 μm). (H) Thirty-thousand cells were seeded into each well of a 6-well plate. The number of U2OS cGAS<sup>-/-</sup> cells transfected with NLS-K394E and flag-vector plasmids was counted every day until reaching high density.

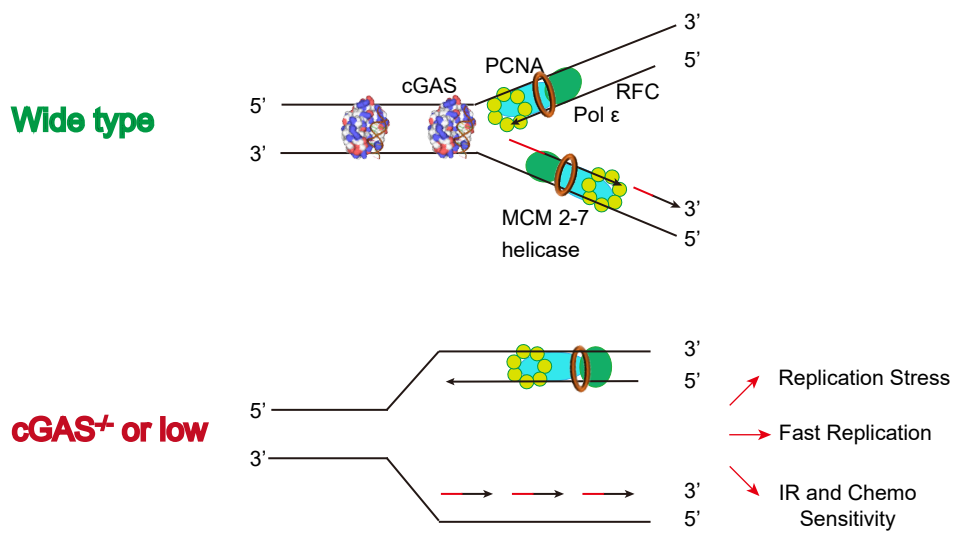

**Figure S5 | Schematic diagram.**

Schematic diagram of the role of cGAS in response to DNA damage via replication regulation.

| <b>Antibodies</b>                                    | <b>Source</b>             | <b>Identifier</b> |
|------------------------------------------------------|---------------------------|-------------------|
| anti-cGAS rabbit monoclonal antibody D1D3G           | Cell Signaling Technology | Cat#15102S        |
| anti-STING rabbit monoclonal antibody D2P2F          | Cell Signaling Technology | Cat#13647S        |
| anti-PCNA mouse monoclonal antibody                  | EMD Millipore             | Cat# NA03         |
| anti- $\beta$ -Actin mouse monoclonal antibody 3700S | Cell Signaling Technology | Cat# 8H10D10      |
| anti- GAPDH rabbit monoclonal antibody D16H11        | Cell Signaling Technology | Cat# 5174S        |
| anti- Tubulin hFAB Rhodamine antibody                | BIO-RAD                   | Cat# 12004167     |
| anti-p-ATR (Thr1989) rabbit monoclonal antibody      | Cell Signaling Technology | Cat# 58014S       |
| anti-ATR rabbit monoclonal antibody                  | Bethyl Laboratories Inc   | Cat# A300-137A-M  |
| anti-p-CHK1(Ser317) rabbit monoclonal antibody D7H2  | Cell Signaling Technology | Cat# 8191S        |
| anti-CHK1(2345) rabbit monoclonal antibody 2G1D5     | Cell Signaling Technology | Cat# 2360         |
| anti-FLAG M2 mouse monoclonal antibody               | Sigma                     | Cat# F1804        |
| anti-MCM2 rabbit affinity purified                   | Bethyl Laboratories Inc   | Cat# A300-191A    |
| anti-Fen 1 rabbit affinity purified                  | Bethyl Laboratories Inc   | Cat# A300-255A    |
| Anti-MCM7 (141) mouse monoclonal antibody            | Santa Cruz Biotechnology  | Cat# sc-9966      |
| Mouse Anti- RRM2 (AA 1-110)                          | 4A Biotech                | Cat# ABIN562744   |
| Goat Anti-Rabbit IgG StarBright Blue 520             | BIO-RAD                   | Cat# 12005869     |
| Goat Anti-Mouse IgG StarBright Blue 700              | BIO-RAD                   | Cat# 1200415      |
| Rabbit Anti-Mouse IgG H&L (HRP)                      | Abcam                     | Cat# ab6728       |
| Goat Anti-Rabbit IgG H&L (HRP)                       | Abcam                     | Cat# ab6721       |

**Table S1| List of Antibodies for Western blot.**
